# Supplementary material for: Inhibition of DNMT1 methyltransferase activity via glucose-regulated O-GlcNAcylation alters the epigenome
Source: bioRxiv or medRxiv preprint supplement (doi:10.1101/2022.05.11.491514), 2023-01-25

**Data S1.** Original Images of Representative Western blot Related to Figures 1-3 and S1-S2.

**Figure 1A**

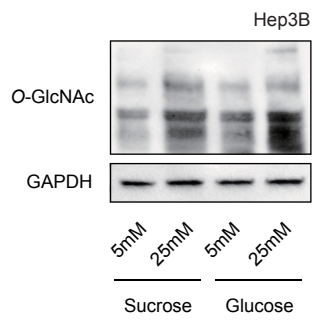

O-GlcNAc

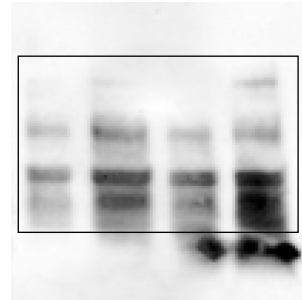

GAPDH

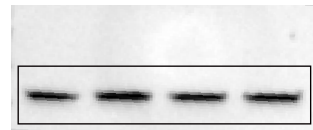

**Figure 1B**

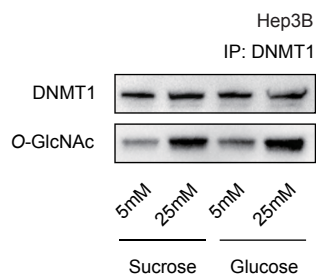

DNMT1

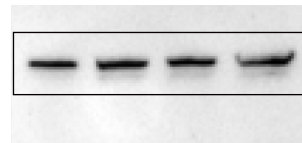

O-GlcNAc

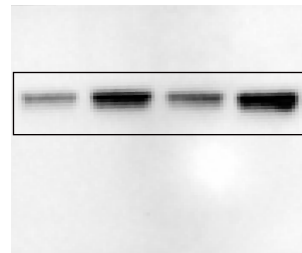

**Figure 1C**

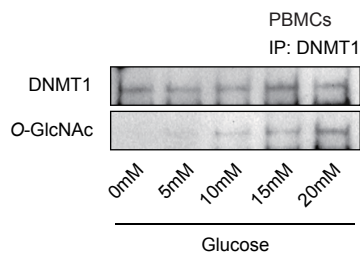

DNMT1

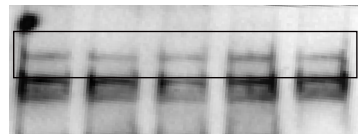

O-GlcNAc

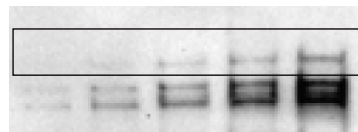

**Figure 1D**

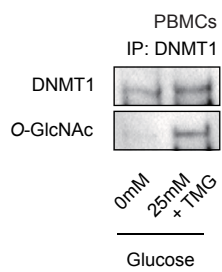

DNMT1

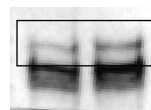

O-GlcNAc

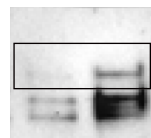

**Figure S1B**

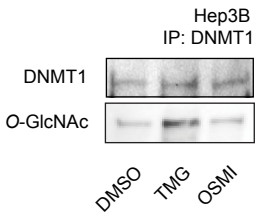

DNMT1

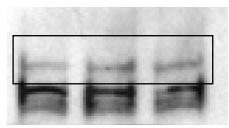

O-GlcNAc

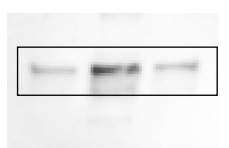

**Figure S1C**

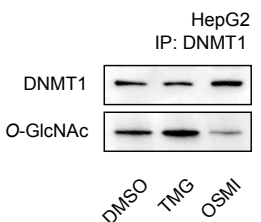

DNMT1

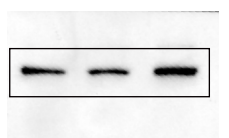

O-GlcNAc

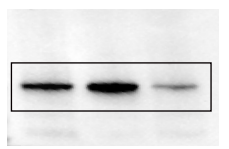

**Figure S1D**

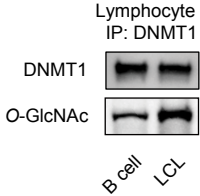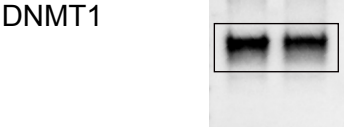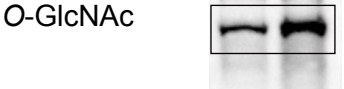

**Figure S1E**

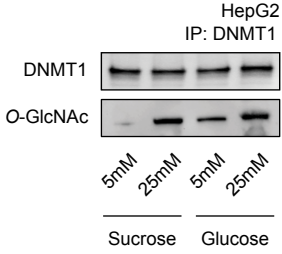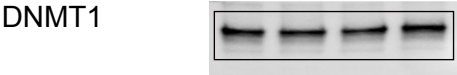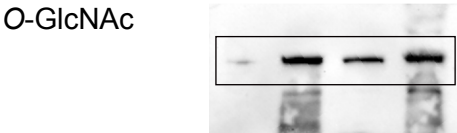

**Figure S2A**

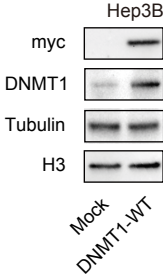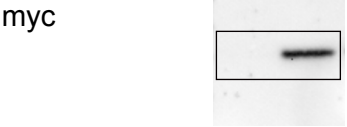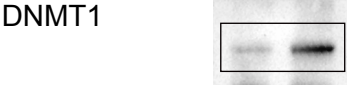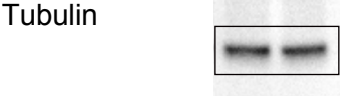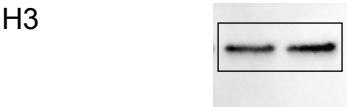

**Figure 2C**

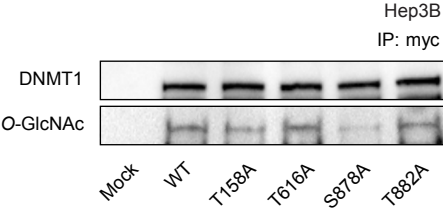

**DNMT1**

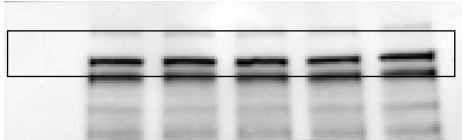

**O-GlcNAc**

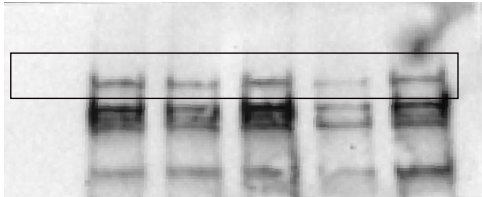

**Figure 3A**

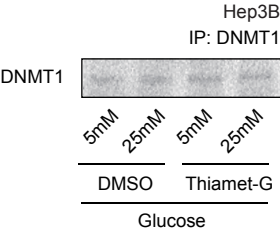

**DNMT1**

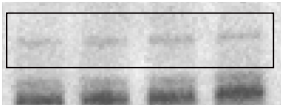

**Figure 3B**

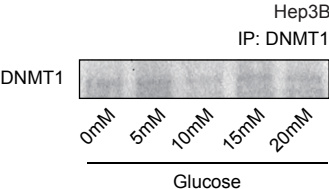

**DNMT1**

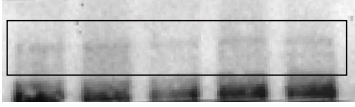

**Figure 3C**

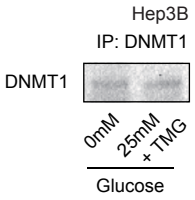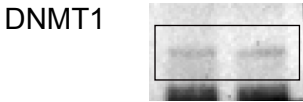

**Figure 3D**

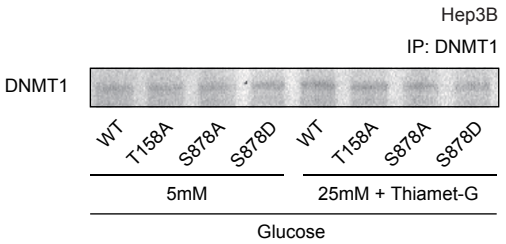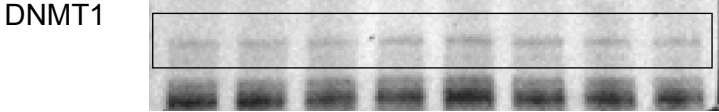

**Figure S1A**

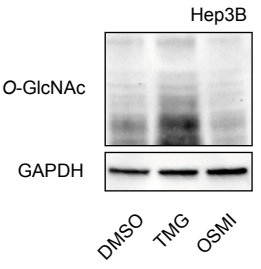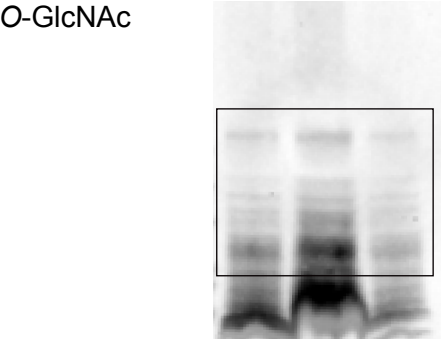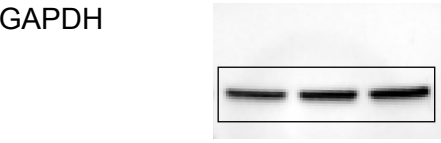

**Figure S2A**

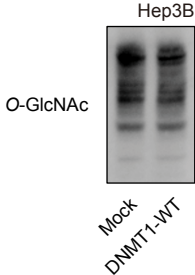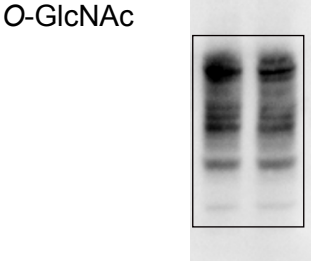

**Figure S2B**

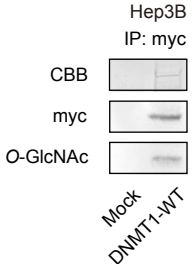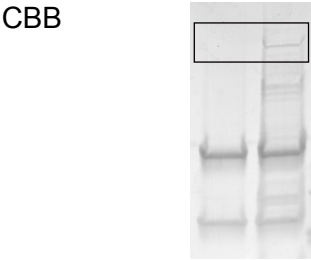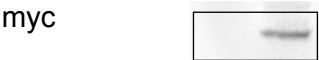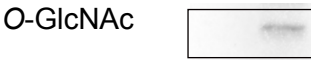

Supplement: Supplementary file [file media-3.pdf]
